# Supplementary material for: The stable cycling of a high-capacity Bi anode enabled by an in situ-generated Li3PO4 transition layer in a sulfide-based all-solid-state battery
Source: Royal Society of Chemistry journal article supplement (doi:10.1039/d0cc01552k), 2020-01-01
Supplement: d0cc01552k1.pdf [file d0cc01552k1.pdf]

### Electronic Supplementary Information

#### **Stable cycling of high-capacity Bi anode enabled by in-situ generated $\text{Li}_3\text{PO}_4$ transition layer in sulfide-based all-solid-state battery**

Qin Li, Yi Cao, Geping Yin, Yunzhi Gao\*

*MIIT Key Laboratory of Critical Materials Technology for New Energy Conversion and Storage,  
School of Chemistry and Chemical Engineering, Harbin Institute of Technology, Harbin 150001,  
China*

\*Corresponding authors: Yunzhi Gao

Postal address: School of Chemistry and Chemical Engineering, Harbin Institute of Technology,  
No. 92, West Dazhi Street, Harbin 150001, China.

Tel.: +86-451-86413721; fax: +86-451-86403807.

E-mail addresses: [gao\\_yunzhihit@hit.edu.cn](mailto:gao_yunzhihit@hit.edu.cn) (Y.Z. Gao)

## 1. Experiments

### 1.1 Materials

$\text{Li}_3\text{PS}_4$  solid electrolytes were obtained by high-energy mechanical milling (PM 100, Retsch). The starting materials,  $\text{Li}_2\text{S}$  (99.98%) and  $\text{P}_2\text{S}_5$  (99%) were purchased from Sigma-Aldrich and mixed in a zirconia jar (50 mL) at the stoichiometric molar ratio of  $\text{Li}_2\text{S}:\text{P}_2\text{S}_5 = 75:25$  in an argon-filled glovebox. Then the mixture was ball-milled at 500 rpm under room temperature for 40 h. Li chips were purchased from MTI Corporation. Bi and  $\text{BiPO}_4$  (99%) were also purchased from Sigma-Aldrich.

### 1.2 Characterization

To characterize the structural information of solid electrolyte, powder X-ray diffraction patterns (XRD) were collected on a D8 Advance using  $\text{Cu K}\alpha$  radiation with LynxEye and SolX (Bruker AXS, WI). Field-emission scanning electron microscope (SEM, Hitachi SU - 70) was used to collect the morphologies of the samples. The X-ray photoelectron spectra (XPS) data were measured using a Kratos Axis 165 spectrometer with a monochromatic  $\text{Al K}\alpha$  radiation source. All binding-energy values were calibrated relative to 284.8 eV of the C 1s peak.

### 1.3 Electrochemistry

LPS pellets (10 mm in diameter) were obtained by pressing 120 mg of the as-prepared LPS powder under 300 MPa in a polytetrafluoroethylene (PTFE) tank. The ionic conductivities of synthesized electrolyte were measured with a blocking symmetric SS/LPS/SS cell by using electrochemical impedance spectroscopy (EIS) collected on a Gamry workstation (Gamry 1000E, Gamry Instruments) with an AC amplitude of 10 mV at room temperature. The frequencies range from 1 MHz to 0.1 Hz. To assemble the all-solid-state cells, the electrode composite was obtained by hand grinding  $\text{BiPO}_4$ , LPS and Carbon black with a weight ratio of 5:5:0.5 in the mortar. Then

the powder (~5 mg) were uniformly dispersed onto the top of the pre-pelleted LPS electrolyte (~120 mg), and then cold-pressed together in the PTFE tank under 300 MPa. After that, Li foil was attached on the other side and acted as both counter and reference electrode. Finally, the three-layered pellet was sandwiched between two stainless steel rods as current collectors. All the above preparation processes were performed in argon-filled glovebox ( $O_2 < 0.1$  ppm,  $H_2O < 0.1$  ppm). Applied currents and rates were calculated based on the weight of  $BiPO_4$  in the electrode. Cells were rested for 5 h prior to the test to allow the stabilization of the interface between Li and electrolyte.

## 2. Supplementary Figures

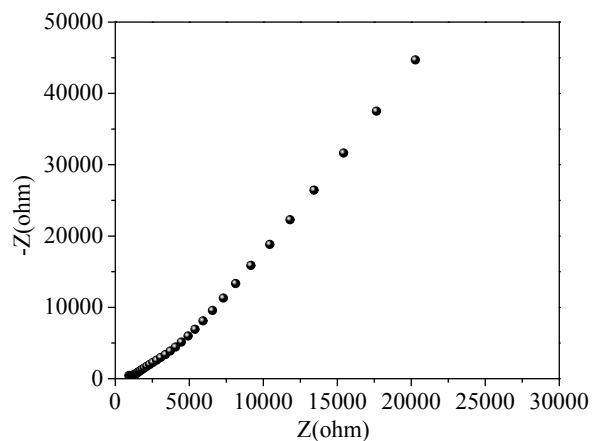

Fig. S1 The electrochemical impedance spectrum of the as-synthesized LPS solid state electrolyte.

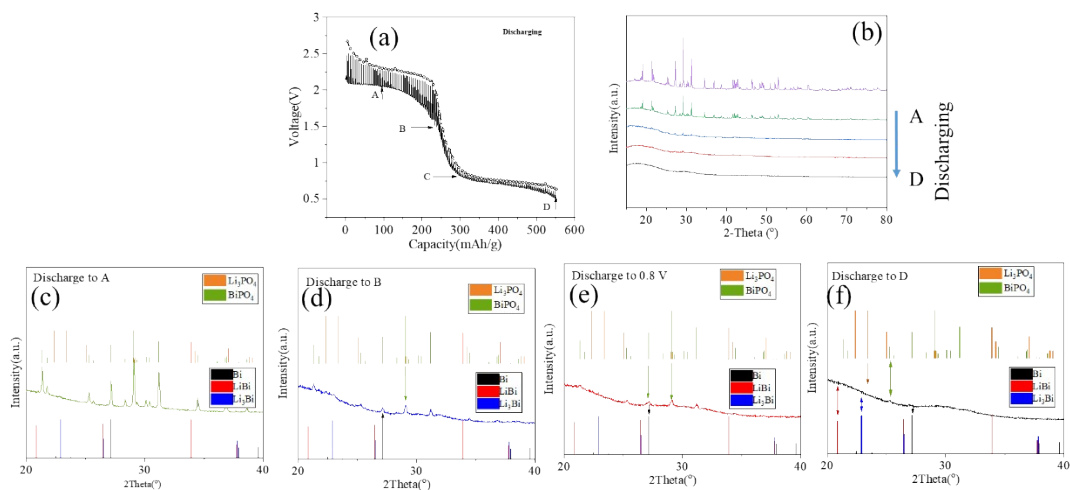

Fig. S2 (a) The discharging curve at 25 mA g<sup>-1</sup> by GITT. (b-f) XRD patterns of composite electrode at different lithiation conditions in (a).

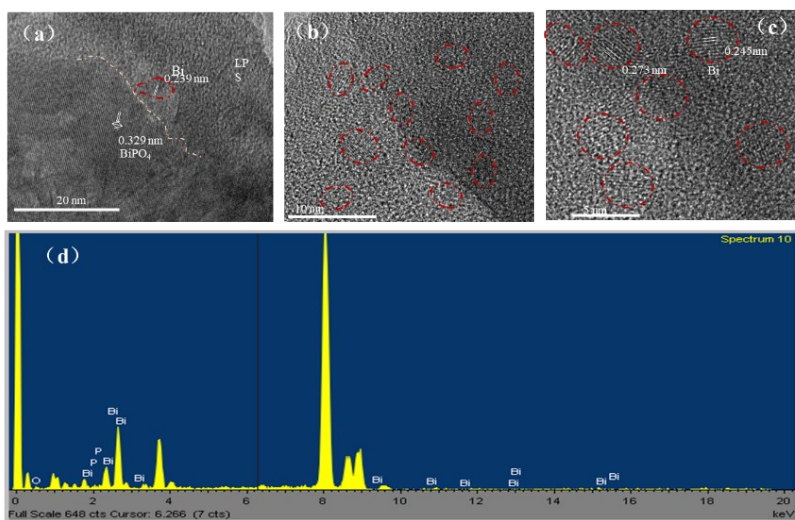

Fig. S3 TEM images of composite electrode after discharging to 2.0 V (a) and 0.8 V (b-c). (d) EDS analysis based on (c).

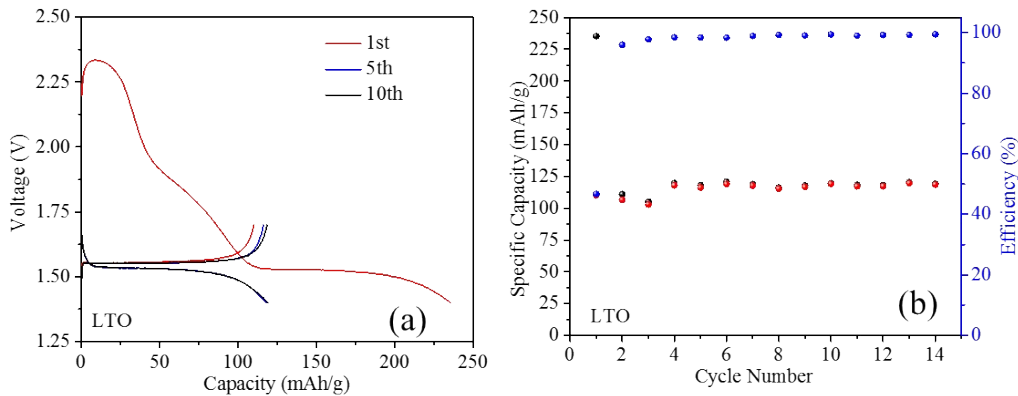

Fig. S4 a) Charge/discharge curves of LTO in different cycles at 0.05 C at room temperature. (b) Corresponding cycling performance of the cell.

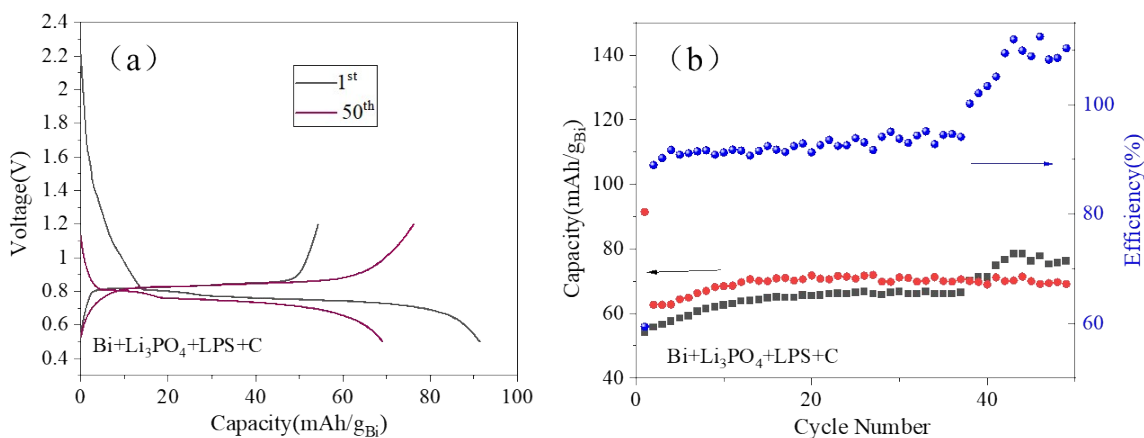

Fig. S5 Typical voltage profiles (a) and corresponding cycling performance at a rate of 25 mA g<sup>-1</sup> (b) of the Bi electrode mixed with Li<sub>3</sub>PO<sub>4</sub> powder.

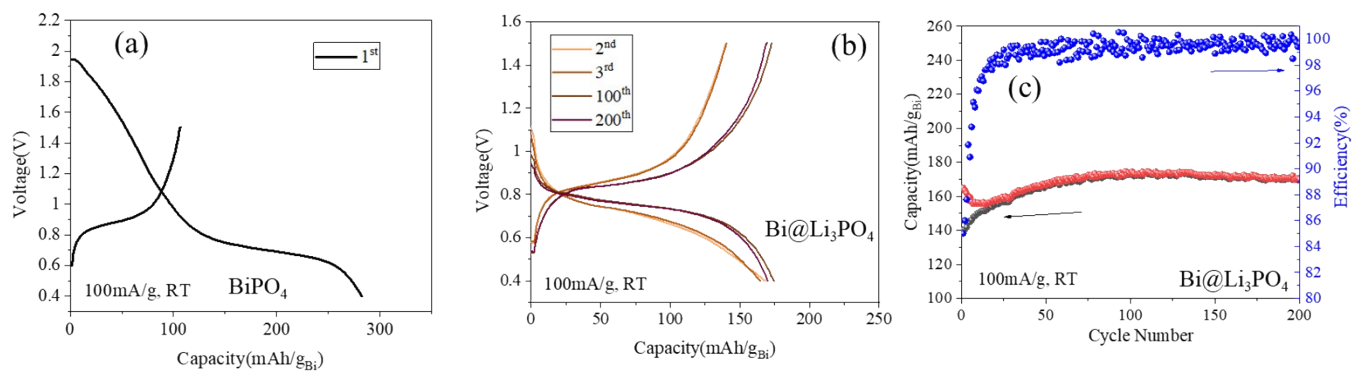

Fig. S6 (a) The initial cycle at 100 mA g<sup>-1</sup> at room temperature of BiPO<sub>4</sub> composite. The typical voltage curves (b) and corresponding cycling performance (c) of Bi@Li<sub>3</sub>PO<sub>4</sub> electrode.

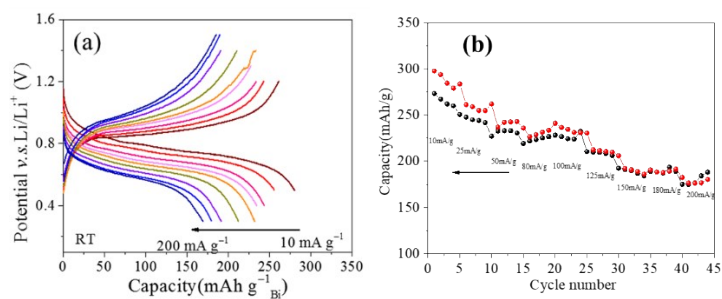

Fig. S7 (a) Typical voltage profiles of the composite electrode at various rates. (b) Cycling performance of the composites at various rates.

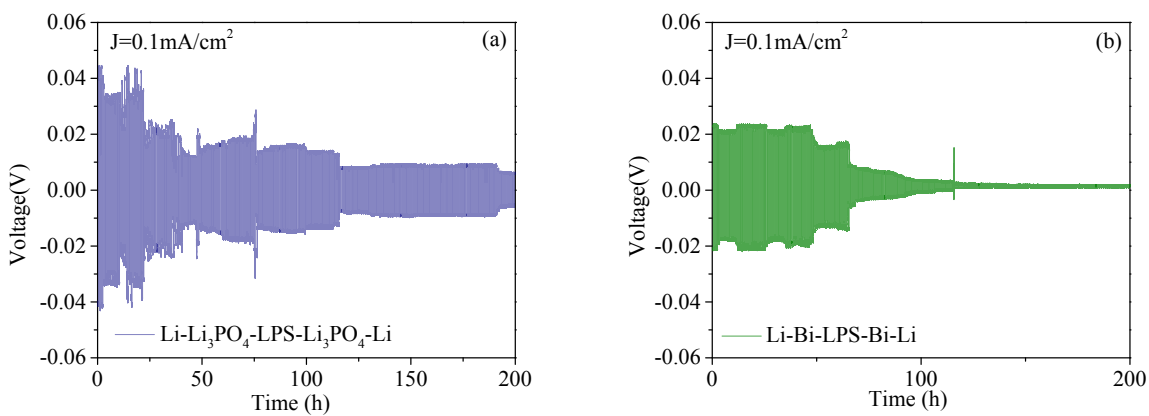

Fig. S8 Galvanostatic cycling of the Li-Li cells at constant current density of  $0.1 \text{ mA cm}^{-2}$  with  $\text{Li}_3\text{PO}_4$  (a) and Bi (b) interlayer. The time for each charge and discharge is 0.5 h.
